# Supplementary material for: Augmented Growth Hormone Secretion and Stat3 Phosphorylation in an Aryl Hydrocarbon Receptor Interacting Protein (AIP)-Disrupted Somatotroph Cell Line
Source: PubMed Central journal article supplement (PMC5051713; doi:10.1371/journal.pone.0164131), 2016-10-05

**Fig. S1**

**A**

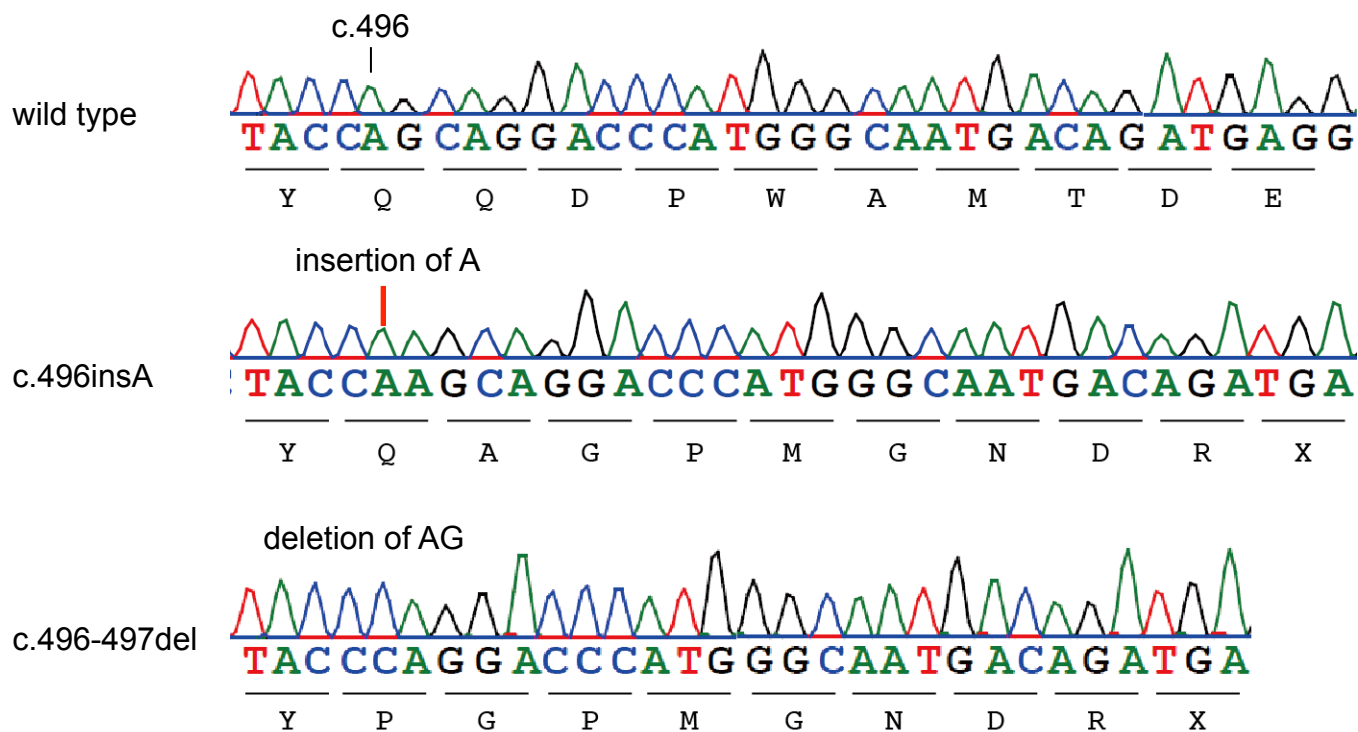

**B**

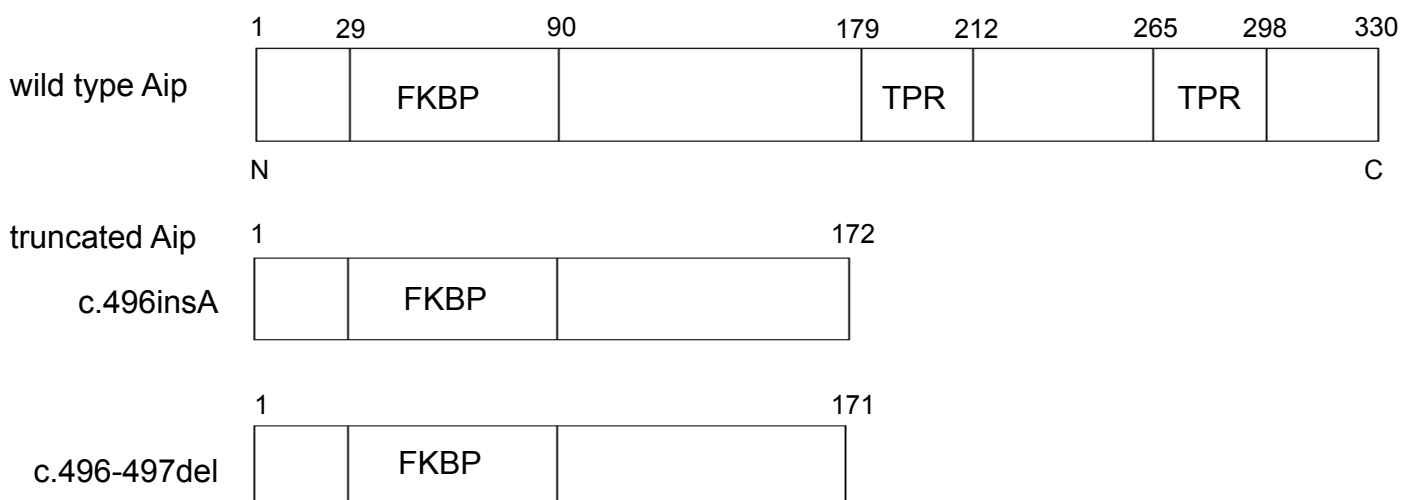

Supplement: pone.0164131.s001.pdf [file pone.0164131.s001.pdf]
