# Supplementary material for: Augmented Growth Hormone Secretion and Stat3 Phosphorylation in an Aryl Hydrocarbon Receptor Interacting Protein (AIP)-Disrupted Somatotroph Cell Line
Source: PubMed Central journal article supplement (PMC5051713; doi:10.1371/journal.pone.0164131), 2016-10-05
Supplement: pone.0164131.s002.pdf [file pone.0164131.s002.pdf]

**S1 Table. Primer list**

| #  | Target                                                     | Sense                     | Antisense                |
|----|------------------------------------------------------------|---------------------------|--------------------------|
| 1  | <i>Aip</i> exon1                                           | AACCAATCACGGCTCTTTCC      | TGACTAGCAGCTGCGCTT       |
| 2  | <i>Aip</i> exon2                                           | ACTGAGATGATGGGATAGAGCC    | CCTGAGGATCAGACATAGAGCA   |
| 3  | <i>Aip</i> exon3                                           | CTTCTCTGTGCCAGTGAG        | GTC AAGGTGGTGATCAGTGAG   |
| 4  | <i>Aip</i> exon4                                           | TGAGAGACAAGTGGTCAGGG      | GGACAGTGGAGACGATGAGA     |
| 5  | <i>Aip</i> exon5                                           | GCTGCTGCCAAGTACTACGA      | TCAACTGAGGGAGATGTTAAAGC  |
| 6  | <i>Aip</i> exon6                                           | ATGGTGGGCTAGTGCCAGA       | CCACTGACTACCAAGCACCTG    |
| 7  | <i>growth hormone1 (Gh1)</i>                               | CCTTGTCCAGTCTGTTTGCCAAT   | CTGGGATGGTCTCTGAGAAGCAG  |
| 8  | <i>ploractin (PrI)</i>                                     | CCAAGATCGTGAGTTTATTGCCAAG | TCCAGGAGTGCACCAAAGTGA    |
| 9  | <i>aryl-hydrocarbon receptor-interacting protein (Aip)</i> | CATTGCCTGCCTCAAGAACC      | CCGCTTGAAGTAAGCCTTGACA   |
| 10 | <i>interleukin 6 receptor (Il6r)</i>                       | TCGTTTCAGTTCCGCACAGGTGTA  | CTGGTAAGGATGACCCAAGGATG  |
| 11 | <i>somatostatin receptor 2 (Sstr2)</i>                     | GAAAGCAGCTACCCGGCAGA      | GATTACATAGCGGGCAAGCACAC  |
| 12 | <i>pleiomorphic adenoma gene-like 1 (Plagl1)</i>           | CTTTGAAGACTCTGTATTTCCAGCA | GTCTTCAAGGTTAGGGTACAAATG |
| 13 | <i>actin, beta (Actb)</i>                                  | GGAGATTACTGCCCTGGCTCCTA   | GACTCATCGTACTCCTGCTTGCTG |
