# Supplementary material for: Augmented Growth Hormone Secretion and Stat3 Phosphorylation in an Aryl Hydrocarbon Receptor Interacting Protein (AIP)-Disrupted Somatotroph Cell Line
Source: PubMed Central journal article supplement (PMC5051713; doi:10.1371/journal.pone.0164131), 2016-10-05
Supplement: pone.0164131.s003.pdf [file pone.0164131.s003.pdf]

| Target           | Name of Antibody                             | Manufacturer, catalog # | Species raised in; monoclonal or polyclonal | Dilution used   |
|------------------|----------------------------------------------|-------------------------|---------------------------------------------|-----------------|
| Aip              | AIP/ARA9 antibody (35-2)                     | Novus, #NB100-127       | mouse, monoclonal                           | 1:1000 (WB)     |
|                  |                                              |                         |                                             | 1:100 (IP)      |
| p-Stat3 (Tyr705) | Phospho-Stat3 (Tyr705) (D3A7)                | CST, #9145              | rabbit, monoclonal                          | 1:2000 (WB)     |
|                  |                                              |                         |                                             | 1:100 (IP)      |
| Stat3            | Stat3 (D3Z2G)                                | CST, #12640             | rabbit, monoclonal                          | 1:1000 (WB)     |
|                  |                                              |                         |                                             | 1:100 (IP)      |
| Sstr2            | Anti-Somatostatin Receptor 2 antibody [UMB1] | abcam, #ab134152        | rabbit, mmonoclonal                         | 1:5000 (WB)     |
| beta-actin       | Monoclonal Anti-b-Actin Clone AC-15          | SIGMA-ALDRICH, #A5441   | mouse, monoclonal                           | 1:5000 (WB)     |
| Rabbit IgG       | Anti-rabbit IgG, HRP-linked Antibody         | CST, #7074              | goat                                        | 1:2000 (WB)     |
| Mouse IgG        | Anti-mouse IgG, HRP-linked Antibody          | CST, #7076              | horse                                       | 1:2000 (WB)     |
| Gh               | Anti-rat Growth Hormone Antibody             | R&D, #AF1566            | goat                                        | 5 µg/mL (IHC-P) |
